# Supplementary material for: Electroencephalogram-derived pain index for evaluating pain during labor
Source: PeerJ. 2021 Dec 22;9:e12714. doi: 10.7717/peerj.12714 (PMC8710049; doi:10.7717/peerj.12714)
Supplement: Supplemental Information 1 [file peerj-09-12714-s001.xls]

## Sheet: baseline data
case	stage of labor	age	weight	height	gestational age	width of cervix	primipara(yes for 1)
1	active phase	39	84	165	34+5	3	1
2	active phase	29	66.3	156	37+3	3	1
3	active phase	34	70	162	39+3	3	0
4	active phase	34	59	156	40	5	1
5	active phase	43	71.6	162	40+3	3	1
6	active phase	30	66	150	38+4	3	1
7	active phase	31	74	170	38	6	1
8	active phase	27	60	164	41	3	0
9	latent phase	35	61	160	40+6	2	1
10	latent phase	36	84	163	41	2 to 3	1
11	latent phase	37	72	170	39+3	1 to 2	0
12	latent phase	32	70	163	39	0	1
13	latent phase	31	61.5	154	40+3	0	1
14	latent phase	33	81	160	40+2	1	1
15	latent phase	33	67	160	39+6	2	1
16	latent phase	40	70	158	37+4	2	0
17	latent phase	30	63	163	40	1	1
18	latent phase	37	83.7	160	38+6	2	1
19	latent phase	28	59	159	38+4	1	1
20	latent phase	32	66	162	39+4	2	1
21	latent phase	25	135	166	38	2	0
22	latent phase	34	/	/	40+2	2	1
23	latent phase	31	70	165	39+5	2	1
24	latent phase	31	90	170	22+3	1	1
25	latent phase	29	87.3	162	41+1	2	1
26	latent phase	28	68	164	40+4	2	1
27	latent phase	28	75	162	40	1	1
28	latent phase	37	64	156	37+6	1 to 2	1
29	latent phase	37	73	173	41	1 to 2	1
30	latent phase	35	65.5	170	36+5	2	1
31	latent phase	27	72	158	40+1	1	1
32	latent phase	30	63	165	39+4	2	1
33	latent phase	32	60	163	38+6	1	1
34	latent phase	37	80	168	40+3	2	0
35	latent phase	30	70	169	39+5	2	1
36	latent phase	29	53	158	39+3	2	1
37	latent phase	39	74	162	36+6	1	1
38	latent phase	36	67	160	41+2	2	1
39	latent phase	30	73	156	39	2	1
40	epidural analgeisa	34	68	162	39+3	5	1
41	epidural analgeisa	28	88	167	39+3	3	1
42	epidural analgeisa	32	60	163	38+4	5	1
43	epidural analgeisa	29	53	158	39+3	3	1
44	epidural analgeisa	27	77	162	39	3	1
45	epidural analgeisa	35	72.5	154	38+3	3	1
46	epidural analgeisa	35	69	162	39+6	6	1
47	epidural analgeisa	29	58	153	39	3	1
48	epidural analgeisa	31	76	163	38+3	3	1
49	epidural analgeisa	36	84	163	41	2 to 3	1
50	epidural analgeisa	36	91	164	40	1	1
51	epidural analgeisa	29	71	150	40+4	2	1
52	epidural analgeisa	28	78	158	41	1	1
53	epidural analgeisa	29	82	162	40+5	?	1
54	epidural analgeisa	28	82	158	38+4	3	1
55	epidural analgeisa	38	62	162	40+4	3	1
56	epidural analgeisa	31	75	162	40+1	2	1
57	epidural analgeisa	30	72	163	38+6	2	1
58	epidural analgeisa	39	75	165	39+3	4	1
59	epidural analgeisa	32	76	163	39+3	6	1
60	epidural analgeisa	35	73	163	40	3	1
61	second stage of labor	29	75	168	40	10	1
62	second stage of labor	28	98	170	40+6	10	1
63	second stage of labor	32	91	167	39+5	10	1
64	second stage of labor	40	60	157	37+5	10	0
65	second stage of labor	30	89	172.5	40+6	10	1
66	second stage of labor	37	72.5	158	39	10	1
67	second stage of labor	33	100	170	38	10	0
68	second stage of labor	26	68	160	40+6	10	1
69	second stage of labor	33	63	164	39+3	10	1
70	second stage of labor	24	68	165	40+2	10	1
71	second stage of labor	29	70	164	40+7	10	1
72	second stage of labor	29	65	163	39+1	10	1
73	second stage of labor	29	66	165	40+3	10	0
74	second stage of labor	31	65.5	164	38+6	10	1
75	second stage of labor	33	63	159	40+1	10	1
76	second stage of labor	39	71	158	36+6	10	1
77	second stage of labor	30	68	160	40	10	1
78	second stage of labor	26	78	168	39+1	10	1
79	second stage of labor	32	86	166	38+4	10	0
80	second stage of labor	31	76	163	38+3	10	1

## Sheet: pain intensity data
number of uterine contraction	status of uterine contraction	case number	stage of labor	Pi	NRS
1	initiation	1	latent phase	21.4	5
1	apex	1	latent phase	63	10
1	interval	1	latent phase	16.42	3
2	initiation	1	latent phase	16	5
2	apex	1	latent phase	48	10
2	interval	1	latent phase	14.58	3
3	initiation	1	latent phase	12.2	5
3	apex	1	latent phase	58	10
3	interval	1	latent phase	24.52	3
4	initiation	1	latent phase	5.6	5
4	apex	1	latent phase	40	10
4	interval	1	latent phase	9.78	3
5	initiation	1	latent phase	20.6	5
5	apex	1	latent phase	42	10
1	initiation	2	latent phase	8	2
1	apex	2	latent phase	13	6
1	interval	2	latent phase	26.62	3
2	initiation	2	latent phase	18.2	2
2	apex	2	latent phase	43	5
2	interval	2	latent phase	20.8	2
1	initiation	3	latent phase	12.6	4
1	apex	3	latent phase	28	6
1	interval	3	latent phase	24.34	1
2	initiation	3	latent phase	12	4
2	apex	3	latent phase	19	6
2	interval	3	latent phase	14.98	1
3	initiation	3	latent phase	19.4	4
3	apex	3	latent phase	21	6
1	initiation	4	active phase	3.4	3
1	apex	4	active phase	16	8
1	interval	4	active phase	3.68	0
2	initiation	4	active phase	5	3
2	apex	4	active phase	9	8
2	interval	4	active phase	6.82353	0
3	initiation	4	active phase	8.8	3
3	apex	4	active phase	10	8
3	interval	4	active phase	1.5	0
4	initiation	4	active phase	12.6	3
4	apex	4	active phase	28	8
1	initiation	5	latent phase	9.2	5
1	apex	5	latent phase	28	8
1	interval	5	latent phase	22.2703	1
2	initiation	5	latent phase	19	5
2	apex	5	latent phase	20	9
2	interval	5	latent phase	19.68	1
3	initiation	5	latent phase	19	5
3	apex	5	latent phase	24	9
3	interval	5	latent phase	18.3429	1
4	initiation	5	latent phase	18	5
4	apex	5	latent phase	19	8
4	interval	5	latent phase	10.92	1
5	initiation	5	latent phase	12	5
5	apex	5	latent phase	17	9
1	initiation	6	latent phase	45.4	6
1	apex	6	latent phase	48	10
1	interval	6	latent phase	32.3929	2
2	initiation	6	latent phase	33.2	6
2	apex	6	latent phase	69	10
2	interval	6	latent phase	8.64	2
3	initiation	6	latent phase	35	6
3	apex	6	latent phase	49	10
3	interval	6	latent phase	15.36	2
4	initiation	6	latent phase	10.4	6
4	apex	6	latent phase	63	10
4	interval	6	latent phase	18.04	2
1	initiation	7	latent phase	8.2	1
1	apex	7	latent phase	18	3
1	interval	7	latent phase	17.42	1
2	initiation	7	latent phase	21	2
2	apex	7	latent phase	23	3
1	initiation	8	latent phase	12.4	5
1	apex	8	latent phase	32	9
1	interval	8	latent phase	18.64	3
2	initiation	8	latent phase	26	5
2	apex	8	latent phase	27	9
2	interval	8	latent phase	22.36	3
3	initiation	8	latent phase	25	5
3	apex	8	latent phase	30	9
3	interval	8	latent phase	23.1	3
4	initiation	8	latent phase	25	5
4	apex	8	latent phase	26	9
4	interval	8	latent phase	15.3488	3
5	initiation	8	latent phase	20	5
5	apex	8	latent phase	31	9
1	initiation	9	latent phase	12.8	2
1	apex	9	latent phase	14	5
1	interval	9	latent phase	5.42	1
2	initiation	9	latent phase	5.4	2
2	apex	9	latent phase	6	4
2	interval	9	latent phase	1.7	1
3	initiation	9	latent phase	2.6	2
3	apex	9	latent phase	21	5
3	interval	9	latent phase	2.44	1
4	initiation	9	latent phase	6	2
4	apex	9	latent phase	9	6
4	interval	9	latent phase	1.5	2
5	initiation	9	latent phase	2.8	2
5	apex	9	latent phase	8	6
1	initiation	10	active phase	27.6	3
1	apex	10	active phase	30	8
1	interval	10	active phase	15.4792	2
2	initiation	10	active phase	18	3
2	apex	10	active phase	21	8
2	interval	10	active phase	18.58	2
3	initiation	10	active phase	31.6	3
3	apex	10	active phase	85	8
1	initiation	11	latent phase	19.8	4
1	apex	11	latent phase	24	10
1	interval	11	latent phase	17.7	1
2	initiation	11	latent phase	32	4
2	apex	11	latent phase	33	10
2	interval	11	latent phase	14.76	1
3	initiation	11	latent phase	16	4
3	apex	11	latent phase	23	10
3	interval	11	latent phase	18.5	1
4	initiation	11	latent phase	19.8	4
4	apex	11	latent phase	20	10
1	initiation	12	latent phase	27.8	4
1	apex	12	latent phase	29	7
1	interval	12	latent phase	8.8	3
2	initiation	12	latent phase	34	4
2	apex	12	latent phase	35	8
2	interval	12	latent phase	5.48	3
3	initiation	12	latent phase	14.6	4
3	apex	12	latent phase	28	9
3	interval	12	latent phase	5.78	4
4	initiation	12	latent phase	11.2	4
4	apex	12	latent phase	18	8
4	interval	12	latent phase	1.64	3
5	initiation	12	latent phase	4.4	4
5	apex	12	latent phase	27	9
1	initiation	13	latent phase	5	3
1	apex	13	latent phase	20	9
1	interval	13	latent phase	9.92	1
2	initiation	13	latent phase	11.8	3
2	apex	13	latent phase	29	9
2	interval	13	latent phase	15.72	1
3	initiation	13	latent phase	23.4	3
3	apex	13	latent phase	27	9
3	interval	13	latent phase	10.9	1
4	initiation	13	latent phase	22.4	3
4	apex	13	latent phase	27	9
1	initiation	14	active phase	33	3
1	apex	14	active phase	37	6
1	interval	14	active phase	17.52	1
2	initiation	14	active phase	24.6	3
2	apex	14	active phase	47	6
2	interval	14	active phase	28.52	1
3	initiation	14	active phase	22.6	3
3	apex	14	active phase	34	6
3	interval	14	active phase	17.4	1
1	initiation	15	active phase	1.4	6
1	apex	15	active phase	47	9
1	interval	15	active phase	3.56	5
2	initiation	15	active phase	25.8	6
2	apex	15	active phase	27	9
2	interval	15	active phase	15.2667	5
3	initiation	15	active phase	16.2	6
3	apex	15	active phase	40	9
3	interval	15	active phase	19.94	5
4	initiation	15	active phase	24.4	6
4	apex	15	active phase	33	9
4	interval	15	active phase	22.6364	5
5	initiation	15	active phase	27	6
5	apex	15	active phase	50	9
1	initiation	16	active phase	19.8	7
1	apex	16	active phase	38	8
1	interval	16	active phase	21.1	2
2	initiation	16	active phase	25.4	7
2	apex	16	active phase	32	8
2	interval	16	active phase	27.9	2
3	initiation	16	active phase	22	7
3	apex	16	active phase	41	8
3	interval	16	active phase	22.28	2
4	initiation	16	active phase	20	7
4	apex	16	active phase	34	8
4	interval	16	active phase	13.78	2
5	initiation	16	active phase	28.8	7
5	apex	16	active phase	37	8
1	initiation	17	latent phase	13.6	3
1	apex	17	latent phase	14	6
1	interval	17	latent phase	12.38	2
2	initiation	17	latent phase	32.2	5
2	apex	17	latent phase	36	8
2	interval	17	latent phase	9.54	3
3	initiation	17	latent phase	26.2	5
3	apex	17	latent phase	35	8
3	interval	17	latent phase	14.98	2
4	initiation	17	latent phase	30	3
4	apex	17	latent phase	32	6
1	initiation	18	latent phase	2	2
1	apex	18	latent phase	9	4
1	interval	18	latent phase	7.36	1
2	initiation	18	latent phase	5.6	2
2	apex	18	latent phase	16	4
2	interval	18	latent phase	16.46	1
3	initiation	18	latent phase	8.8	2
3	apex	18	latent phase	12	4
1	initiation	19	latent phase	16.8	2
1	apex	19	latent phase	20	3
1	interval	19	latent phase	19.64	1
2	initiation	19	latent phase	15.6	2
2	apex	19	latent phase	18	3
2	interval	19	latent phase	17.64	1
3	initiation	19	latent phase	14	2
3	apex	19	latent phase	26	3
1	initiation	20	latent phase	3.8	3
1	apex	20	latent phase	22	7
1	interval	20	latent phase	23.3636	1
2	initiation	20	latent phase	24.8	3
2	apex	20	latent phase	27	7
2	interval	20	latent phase	11.36	1
3	initiation	20	latent phase	17.6	3
3	apex	20	latent phase	26	7
3	interval	20	latent phase	17.78	1
4	initiation	20	latent phase	15.2	3
4	apex	20	latent phase	22	7
4	interval	20	latent phase	13.84	1
5	initiation	20	latent phase	18.6	3
5	apex	20	latent phase	42	7
1	initiation	21	latent phase	27.2	7
1	apex	21	latent phase	42	9
1	interval	21	latent phase	6.43333	0
2	initiation	21	latent phase	7.8	7
2	apex	21	latent phase	13	9
2	interval	21	latent phase	12.95	0
3	initiation	21	latent phase	13.6	7
3	apex	21	latent phase	48	9
3	interval	21	latent phase	13.2727	0
4	initiation	21	latent phase	5	7
4	apex	21	latent phase	33	9
1	initiation	22	latent phase	33.4	5
1	apex	22	latent phase	46	10
1	interval	22	latent phase	13.5	0
2	initiation	22	latent phase	21.6	5
2	apex	22	latent phase	34	10
2	interval	22	latent phase	15.62	0
3	initiation	22	latent phase	31.4	5
3	apex	22	latent phase	52	10
3	interval	22	latent phase	32.2564	0
4	initiation	22	latent phase	36.8	5
4	apex	22	latent phase	57	10
4	interval	22	latent phase	25.92	0
1	initiation	23	latent phase	25.6	4
1	apex	23	latent phase	33	9
1	interval	23	latent phase	23.62	1
2	initiation	23	latent phase	22	4
2	apex	23	latent phase	49	9
2	interval	23	latent phase	11.5312	1
3	initiation	23	latent phase	26.4	4
3	apex	23	latent phase	42	9
3	interval	23	latent phase	16.9211	1
4	initiation	23	latent phase	26.2	4
4	apex	23	latent phase	57	9
4	interval	23	latent phase	10.04	1
5	initiation	23	latent phase	32.2	4
5	apex	23	latent phase	51	9
1	initiation	24	latent phase	26	2
1	apex	24	latent phase	27	6
1	interval	24	latent phase	4.5	1
2	initiation	24	latent phase	12.6	2
2	apex	24	latent phase	25	6
2	interval	24	latent phase	2.38	1
3	initiation	24	latent phase	0.2	2
3	apex	24	latent phase	28	6
3	interval	24	latent phase	10.04	1
4	initiation	24	latent phase	19.4	2
4	apex	24	latent phase	30	6
4	interval	24	latent phase	11.1111	1
1	initiation	25	latent phase	21	3
1	apex	25	latent phase	24	8
1	interval	25	latent phase	13.2	1
2	initiation	25	latent phase	26.8	2
2	apex	25	latent phase	29	6
2	interval	25	latent phase	17.6471	1
3	initiation	25	latent phase	16.8	3
3	apex	25	latent phase	17	8
3	interval	25	latent phase	18.5278	1
4	initiation	25	latent phase	14.6	2
4	apex	25	latent phase	18	7
4	interval	25	latent phase	13.9	1
5	initiation	25	latent phase	31.4	4
5	apex	25	latent phase	33	9
1	initiation	26	latent phase	3.8	1
1	apex	26	latent phase	8	1
1	interval	26	latent phase	10.04	0
2	initiation	26	latent phase	0	1
2	apex	26	latent phase	5	1
2	interval	26	latent phase	4.04	0
3	initiation	26	latent phase	3.6	4
3	apex	26	latent phase	55	8
3	interval	26	latent phase	7.32	1
4	initiation	26	latent phase	0	1
4	apex	26	latent phase	28	1
4	interval	26	latent phase	7.06	2
5	initiation	26	latent phase	0	1
5	apex	26	latent phase	5	1
5	interval	26	latent phase	5.22	1
6	initiation	26	latent phase	2	3
6	apex	26	latent phase	44	8
6	interval	26	latent phase	7.02	1
7	initiation	26	latent phase	29	3
7	apex	26	latent phase	55	8
1	initiation	27	latent phase	18	6
1	apex	27	latent phase	18	9
1	interval	27	latent phase	24.5	3
2	initiation	27	latent phase	26.4	6
2	apex	27	latent phase	42	9
2	interval	27	latent phase	20.18	3
3	initiation	27	latent phase	28.2	6
3	apex	27	latent phase	29	9
1	initiation	28	latent phase	18.4	3
1	apex	28	latent phase	29	8
1	interval	28	latent phase	13.5	1
2	initiation	28	latent phase	14	3
2	apex	28	latent phase	26	8
2	interval	28	latent phase	0.48	1
3	initiation	28	latent phase	30.2	3
3	apex	28	latent phase	32	8
3	interval	28	latent phase	11.28	1
4	initiation	28	latent phase	9.4	3
4	apex	28	latent phase	25	8
4	interval	28	latent phase	8.61111	1
5	initiation	28	latent phase	0	3
5	apex	28	latent phase	4	8
1	initiation	29	latent phase	15.2	1
1	apex	29	latent phase	18	3
1	interval	29	latent phase	12.6	0
2	initiation	29	latent phase	13	1
2	apex	29	latent phase	18	3
2	interval	29	latent phase	12.18	0
3	initiation	29	latent phase	13.4	1
3	apex	29	latent phase	15	3
1	initiation	30	latent phase	1.4	2
1	apex	30	latent phase	3	3
1	interval	30	latent phase	1.52381	0
2	initiation	30	latent phase	4	2
2	apex	30	latent phase	4	3
2	interval	30	latent phase	0	0
3	initiation	30	latent phase	0	2
3	apex	30	latent phase	5	3
3	interval	30	latent phase	0.82	0
4	initiation	30	latent phase	0	2
4	apex	30	latent phase	5	3
4	interval	30	latent phase	2.1	0
5	initiation	30	latent phase	0	2
5	apex	30	latent phase	1	4
1	initiation	31	latent phase	12.2	2
1	apex	31	latent phase	16	5
1	interval	31	latent phase	0.2	0
2	initiation	31	latent phase	1	1
2	apex	31	latent phase	15	5
2	interval	31	latent phase	4.14	0
3	initiation	31	latent phase	6	1
3	apex	31	latent phase	14	5
3	interval	31	latent phase	2.4	0
4	initiation	31	latent phase	1.2	1
4	apex	31	latent phase	15	5
1	initiation	32	latent phase	11.2	3
1	apex	32	latent phase	19	5
1	interval	32	latent phase	7.9	2
2	initiation	32	latent phase	18	3
2	apex	32	latent phase	26	5
2	interval	32	latent phase	27.28	2
3	initiation	32	latent phase	13.4	3
3	apex	32	latent phase	18	5
1	initiation	33	active phase	2	4
1	apex	33	active phase	4	6
1	interval	33	active phase	3	1
2	initiation	33	active phase	2.4	4
2	apex	33	active phase	3	6
2	interval	33	active phase	2.04	1
3	initiation	33	active phase	5	4
3	apex	33	active phase	12	6
3	interval	33	active phase	4.89655	1
4	initiation	33	active phase	10.8	4
4	apex	33	active phase	13	6
1	initiation	34	latent phase	12	2
1	apex	34	latent phase	14	4
1	interval	34	latent phase	3.68	0
2	initiation	34	latent phase	8.8	2
2	apex	34	latent phase	10	4
2	interval	34	latent phase	7.54	0
3	initiation	34	latent phase	9.4	2
3	apex	34	latent phase	13	4
3	interval	34	latent phase	2.96	0
4	initiation	34	latent phase	3.6	2
4	apex	34	latent phase	11	4
4	interval	34	latent phase	5.48	0
5	initiation	34	latent phase	10.2	2
5	apex	34	latent phase	20	4
1	initiation	35	latent phase	23.6	4
1	apex	35	latent phase	44	8
1	interval	35	latent phase	3.66667	3
2	initiation	35	latent phase	2.2	4
2	apex	35	latent phase	46	9
2	interval	35	latent phase	5.92857	3
3	initiation	35	latent phase	1.2	4
3	apex	35	latent phase	61	8
3	interval	35	latent phase	28.34	3
1	initiation	36	latent phase	5.2	6
1	apex	36	latent phase	58	8
1	interval	36	latent phase	31	3
2	initiation	36	latent phase	32.4	6
2	apex	36	latent phase	36	7
2	interval	36	latent phase	8.34042	3
3	initiation	36	latent phase	39.8	6
3	apex	36	latent phase	52	7
3	interval	36	latent phase	11.8235	3
4	initiation	36	latent phase	32.6	6
4	apex	36	latent phase	57	7
4	interval	36	latent phase	10.0345	3
5	initiation	36	latent phase	25.8	7
5	apex	36	latent phase	52	10
5	interval	36	latent phase	19.04	6
6	initiation	36	latent phase	17.4	6
6	apex	36	latent phase	29	8
6	interval	36	latent phase	27	3
1	initiation	37	latent phase	3	4
1	apex	37	latent phase	13	6
1	interval	37	latent phase	5.88	2
2	initiation	37	latent phase	7.4	4
2	apex	37	latent phase	8	6
2	interval	37	latent phase	2.52	2
3	initiation	37	latent phase	8.8	4
3	apex	37	latent phase	34	6
3	interval	37	latent phase	30.4286	2
4	initiation	37	latent phase	22.2	4
4	apex	37	latent phase	32	6
4	interval	37	latent phase	3.58333	2
5	initiation	37	latent phase	18.6	4
5	apex	37	latent phase	33	6
1	initiation	38	latent phase	5.6	5
1	apex	38	latent phase	14	8
1	interval	38	latent phase	1.16	0
2	initiation	38	latent phase	0.2	2
2	apex	38	latent phase	8	4
2	interval	38	latent phase	6.5	0
3	initiation	38	latent phase	1.8	5
3	apex	38	latent phase	10	7
3	interval	38	latent phase	3.34	0
4	initiation	38	latent phase	6	2
4	apex	38	latent phase	9	4
1	initiation	39	latent phase	2.6	4
1	apex	39	latent phase	14	5
1	interval	39	latent phase	11.3	3
2	initiation	39	latent phase	12.2	4
2	apex	39	latent phase	15	5
2	interval	39	latent phase	8.5	3
3	initiation	39	latent phase	4.8	4
3	apex	39	latent phase	11	5
3	interval	39	latent phase	5.06	3
4	initiation	39	latent phase	8.6	4
4	apex	39	latent phase	12	5
4	interval	39	latent phase	6.5	3
5	initiation	39	latent phase	12.4	4
5	apex	39	latent phase	15	5
1	initiation	40	epidural analgesia	6	2
1	apex	40	epidural analgesia	21	4
1	interval	40	epidural analgesia	15.4651	1
2	initiation	40	epidural analgesia	16	2
2	apex	40	epidural analgesia	20	7
2	interval	40	epidural analgesia	9.86	1
3	initiation	40	epidural analgesia	15	2
3	apex	40	epidural analgesia	23	5
3	interval	40	epidural analgesia	20.22	1
4	initiation	40	epidural analgesia	31	3
4	apex	40	epidural analgesia	37	5
4	interval	40	epidural analgesia	12.54	1
5	initiation	40	epidural analgesia	23.6	3
5	apex	40	epidural analgesia	26	5
5	interval	40	epidural analgesia	7.66	1
1	initiation	41	epidural analgesia	13	0
1	apex	41	epidural analgesia	14	1
1	interval	41	epidural analgesia	12.44	0
2	initiation	41	epidural analgesia	16.8	0
2	apex	41	epidural analgesia	21	1
2	interval	41	epidural analgesia	12.36	0
3	initiation	41	epidural analgesia	19.8	0
3	apex	41	epidural analgesia	20	1
1	initiation	42	epidural analgesia	13.4	2
1	apex	42	epidural analgesia	19	3
1	interval	42	epidural analgesia	10.72	0
2	initiation	42	epidural analgesia	9.6	2
2	apex	42	epidural analgesia	12	3
2	interval	42	epidural analgesia	1.76	0
3	initiation	42	epidural analgesia	17.6	2
3	apex	42	epidural analgesia	19	5
3	interval	42	epidural analgesia	4.46	0
4	initiation	42	epidural analgesia	6.2	2
4	apex	42	epidural analgesia	8	3
4	interval	42	epidural analgesia	0.72	0
5	initiation	42	epidural analgesia	18	3
5	apex	42	epidural analgesia	34	6
1	initiation	43	epidural analgesia	1.2	0
1	apex	43	epidural analgesia	3	1
1	interval	43	epidural analgesia	3.46	0
2	initiation	43	epidural analgesia	1.6	0
2	apex	43	epidural analgesia	3	1
2	interval	43	epidural analgesia	2.32	0
3	initiation	43	epidural analgesia	0	0
3	apex	43	epidural analgesia	3	2
1	initiation	44	epidural analgesia	8	2
1	apex	44	epidural analgesia	13	4
1	interval	44	epidural analgesia	8.38462	0
2	initiation	44	epidural analgesia	5	2
2	apex	44	epidural analgesia	14	4
2	interval	44	epidural analgesia	9.48	0
3	initiation	44	epidural analgesia	7	2
3	apex	44	epidural analgesia	8	4
3	interval	44	epidural analgesia	9.25	0
4	initiation	44	epidural analgesia	7.4	2
4	apex	44	epidural analgesia	19	4
4	interval	44	epidural analgesia	8.24	0
5	initiation	44	epidural analgesia	11.2	2
5	apex	44	epidural analgesia	15	4
1	initiation	45	epidural analgesia	11	0
1	apex	45	epidural analgesia	11	2
1	interval	45	epidural analgesia	2.05405	0
2	initiation	45	epidural analgesia	5	0
2	apex	45	epidural analgesia	7	2
2	interval	45	epidural analgesia	2.4	0
3	initiation	45	epidural analgesia	9.2	0
3	apex	45	epidural analgesia	13	2
3	interval	45	epidural analgesia	11	0
4	initiation	45	epidural analgesia	11.8	0
4	apex	45	epidural analgesia	16	2
4	interval	45	epidural analgesia	11.74	0
5	initiation	45	epidural analgesia	4.4	0
5	apex	45	epidural analgesia	17	2
1	initiation	46	epidural analgesia	5.4	3
1	apex	46	epidural analgesia	23	9
1	interval	46	epidural analgesia	26.3333	2
2	initiation	46	epidural analgesia	34.2	3
2	apex	46	epidural analgesia	35	9
2	interval	46	epidural analgesia	14.7222	2
3	initiation	46	epidural analgesia	30.6	3
3	apex	46	epidural analgesia	34	9
3	interval	46	epidural analgesia	7.86667	2
4	initiation	46	epidural analgesia	28.4	3
4	apex	46	epidural analgesia	34	9
4	interval	46	epidural analgesia	5.44	3
5	initiation	46	epidural analgesia	44.8	3
5	apex	46	epidural analgesia	51	9
1	initiation	47	epidural analgesia	25	8
1	apex	47	epidural analgesia	44	10
1	interval	47	epidural analgesia	15.8947	5
2	initiation	47	epidural analgesia	17	8
2	apex	47	epidural analgesia	36	10
2	interval	47	epidural analgesia	31.1	5
3	initiation	47	epidural analgesia	15.8	8
3	apex	47	epidural analgesia	37	10
3	interval	47	epidural analgesia	22.6342	5
4	initiation	47	epidural analgesia	31.4	8
4	apex	47	epidural analgesia	34	10
1	initiation	48	epidural analgesia	11	4
1	apex	48	epidural analgesia	48	9
1	interval	48	epidural analgesia	1.14706	2
2	initiation	48	epidural analgesia	26.8	4
2	apex	48	epidural analgesia	55	9
2	interval	48	epidural analgesia	5.38462	2
3	initiation	48	epidural analgesia	29.2	4
3	apex	48	epidural analgesia	45	9
3	interval	48	epidural analgesia	4.08333	2
4	initiation	48	epidural analgesia	4.2	4
4	apex	48	epidural analgesia	44	9
4	interval	48	epidural analgesia	3.54546	2
5	initiation	48	epidural analgesia	19.8	4
5	apex	48	epidural analgesia	39	9
5	interval	48	epidural analgesia	5.1	2
6	initiation	48	epidural analgesia	30.6	4
6	apex	48	epidural analgesia	43	9
6	interval	48	epidural analgesia	11.1786	2
7	initiation	48	epidural analgesia	42.4	4
7	apex	48	epidural analgesia	50	9
1	initiation	49	epidural analgesia	12.2	1
1	apex	49	epidural analgesia	13	2
1	interval	49	epidural analgesia	10.16	0
2	initiation	49	epidural analgesia	12	1
2	apex	49	epidural analgesia	13	2
2	interval	49	epidural analgesia	11.2308	0
3	initiation	49	epidural analgesia	13	1
3	apex	49	epidural analgesia	16	2
3	interval	49	epidural analgesia	13.88	0
4	initiation	49	epidural analgesia	11	1
4	apex	49	epidural analgesia	12	2
4	interval	49	epidural analgesia	10.8148	0
5	initiation	49	epidural analgesia	11.8	1
5	apex	49	epidural analgesia	17	2
1	initiation	50	epidural analgesia	7.8	2
1	apex	50	epidural analgesia	11	3
1	interval	50	epidural analgesia	8.62	1
2	initiation	50	epidural analgesia	16.8	3
2	apex	50	epidural analgesia	33	6
2	interval	50	epidural analgesia	20.62	1
3	initiation	50	epidural analgesia	18.2	3
3	apex	50	epidural analgesia	27	6
3	interval	50	epidural analgesia	7.54167	1
4	initiation	50	epidural analgesia	6	3
4	apex	50	epidural analgesia	9	6
4	interval	50	epidural analgesia	3	1
5	initiation	50	epidural analgesia	4.8	2
5	apex	50	epidural analgesia	5	5
5	interval	50	epidural analgesia	2	1
6	initiation	50	epidural analgesia	5	3
6	apex	50	epidural analgesia	12	6
1	initiation	51	epidural analgesia	10.2	1
1	apex	51	epidural analgesia	16	3
1	interval	51	epidural analgesia	15.25	0
2	initiation	51	epidural analgesia	12	1
2	apex	51	epidural analgesia	16	3
2	interval	51	epidural analgesia	9.36	0
3	initiation	51	epidural analgesia	16.2	1
3	apex	51	epidural analgesia	23	3
3	interval	51	epidural analgesia	13.75	0
4	initiation	51	epidural analgesia	11.6	1
4	apex	51	epidural analgesia	13	3
1	initiation	52	epidural analgesia	2	0
1	apex	52	epidural analgesia	18	1
1	interval	52	epidural analgesia	13.72	0
2	initiation	52	epidural analgesia	35.6	0
2	apex	52	epidural analgesia	38	3
2	interval	52	epidural analgesia	3.84	1
3	initiation	52	epidural analgesia	4	0
3	apex	52	epidural analgesia	14	1
3	interval	52	epidural analgesia	13.2	0
4	initiation	52	epidural analgesia	10	1
4	apex	52	epidural analgesia	16	5
4	interval	52	epidural analgesia	11.48	1
1	initiation	53	epidural analgesia	6.4	1
1	apex	53	epidural analgesia	18	2
1	interval	53	epidural analgesia	0.58	0
2	initiation	53	epidural analgesia	2.4	1
2	apex	53	epidural analgesia	3	2
2	interval	53	epidural analgesia	0	0
3	initiation	53	epidural analgesia	0	1
3	apex	53	epidural analgesia	6	2
3	interval	53	epidural analgesia	2.54	0
4	initiation	53	epidural analgesia	2.2	1
4	apex	53	epidural analgesia	5	2
1	initiation	54	epidural analgesia	10.6	2
1	apex	54	epidural analgesia	13	4
1	interval	54	epidural analgesia	10.3	0
2	initiation	54	epidural analgesia	19.2	2
2	apex	54	epidural analgesia	20	4
2	interval	54	epidural analgesia	11.54	0
3	initiation	54	epidural analgesia	13.6	2
3	apex	54	epidural analgesia	20	4
1	initiation	55	epidural analgesia	9.6	1
1	apex	55	epidural analgesia	27	5
1	interval	55	epidural analgesia	13.16	0
2	initiation	55	epidural analgesia	7.8	1
2	apex	55	epidural analgesia	16	5
2	interval	55	epidural analgesia	14.86	0
3	initiation	55	epidural analgesia	14.4	1
3	apex	55	epidural analgesia	17	5
3	interval	55	epidural analgesia	10.96	0
4	initiation	55	epidural analgesia	12	1
4	apex	55	epidural analgesia	17	5
4	interval	55	epidural analgesia	8.78	0
5	initiation	55	epidural analgesia	6.6	1
5	apex	55	epidural analgesia	15	5
1	initiation	56	epidural analgesia	14	1
1	apex	56	epidural analgesia	18	6
1	interval	56	epidural analgesia	14.46	0
2	initiation	56	epidural analgesia	12	1
2	apex	56	epidural analgesia	12	5
2	interval	56	epidural analgesia	10.7381	0
3	initiation	56	epidural analgesia	11.8	1
3	apex	56	epidural analgesia	13	5
3	interval	56	epidural analgesia	11.94	0
4	initiation	56	epidural analgesia	11.4	1
4	apex	56	epidural analgesia	12	4
1	initiation	57	epidural analgesia	10	1
1	apex	57	epidural analgesia	16	2
1	interval	57	epidural analgesia	0	0
2	initiation	57	epidural analgesia	4.6	1
2	apex	57	epidural analgesia	20	2
2	interval	57	epidural analgesia	0.62	0
3	initiation	57	epidural analgesia	0	1
3	apex	57	epidural analgesia	29	2
3	interval	57	epidural analgesia	0.76	0
4	initiation	57	epidural analgesia	1	1
4	apex	57	epidural analgesia	9	2
4	interval	57	epidural analgesia	5.61538	0
5	initiation	57	epidural analgesia	2.4	1
5	apex	57	epidural analgesia	7	2
1	initiation	58	epidural analgesia	20.6	3
1	apex	58	epidural analgesia	28	8
1	interval	58	epidural analgesia	14.58	0
2	initiation	58	epidural analgesia	47	3
2	apex	58	epidural analgesia	62	8
2	interval	58	epidural analgesia	10.4091	0
3	initiation	58	epidural analgesia	18.2	3
3	apex	58	epidural analgesia	32	8
3	interval	58	epidural analgesia	21.383	0
4	initiation	58	epidural analgesia	39.2	3
4	apex	58	epidural analgesia	55	8
1	initiation	59	epidural analgesia	0	2
1	apex	59	epidural analgesia	13	4
1	interval	59	epidural analgesia	7.98	0
2	initiation	59	epidural analgesia	2.6	2
2	apex	59	epidural analgesia	9	4
2	interval	59	epidural analgesia	3.9	0
3	initiation	59	epidural analgesia	3	2
3	apex	59	epidural analgesia	15	4
3	interval	59	epidural analgesia	11.06	0
4	initiation	59	epidural analgesia	12	2
4	apex	59	epidural analgesia	17	4
1	initiation	60	epidural analgesia	6.8	5
1	apex	60	epidural analgesia	14	6
1	interval	60	epidural analgesia	9.3	2
2	initiation	60	epidural analgesia	11.8	5
2	apex	60	epidural analgesia	15	6
2	interval	60	epidural analgesia	11.7917	1
3	initiation	60	epidural analgesia	8.8	5
3	apex	60	epidural analgesia	15	6
3	interval	60	epidural analgesia	3.72	1
4	initiation	60	epidural analgesia	0	5
4	apex	60	epidural analgesia	0	6
4	interval	60	epidural analgesia	1.74	1
5	initiation	60	epidural analgesia	18.4	5
5	apex	60	epidural analgesia	19	6
5	interval	60	epidural analgesia	14.5	1
6	initiation	60	epidural analgesia	3.6	5
6	apex	60	epidural analgesia	8	6
6	interval	60	epidural analgesia	8.64	2
1	initiation	61	second stage of labor	36.6	6
1	apex	61	second stage of labor	40	7
1	interval	61	second stage of labor	3.24	4
2	initiation	61	second stage of labor	30.6	6
2	apex	61	second stage of labor	40	7
2	interval	61	second stage of labor	2.34	4
3	initiation	61	second stage of labor	23.6	6
3	apex	61	second stage of labor	69	7
3	interval	61	second stage of labor	6.87097	4
4	initiation	61	second stage of labor	8.8	6
4	apex	61	second stage of labor	17	7
4	interval	61	second stage of labor	13.8	4
5	initiation	61	second stage of labor	13	6
5	apex	61	second stage of labor	18	7
5	interval	61	second stage of labor	5.82051	4
6	initiation	61	second stage of labor	11	6
6	apex	61	second stage of labor	16	7
6	interval	61	second stage of labor	19.3056	4
7	initiation	61	second stage of labor	18.8	6
7	apex	61	second stage of labor	43	7
1	initiation	62	second stage of labor	19.6	4
1	apex	62	second stage of labor	50	8
1	interval	62	second stage of labor	7.54	1
2	initiation	62	second stage of labor	19.2	4
2	apex	62	second stage of labor	35	8
2	interval	62	second stage of labor	10.72	1
3	initiation	62	second stage of labor	26	4
3	apex	62	second stage of labor	43	8
3	interval	62	second stage of labor	5.86	1
4	initiation	62	second stage of labor	39	4
4	apex	62	second stage of labor	47	8
4	interval	62	second stage of labor	11.7174	1
5	initiation	62	second stage of labor	35.8	4
5	apex	62	second stage of labor	45	8
5	interval	62	second stage of labor	3.58	1
6	initiation	62	second stage of labor	29	4
6	apex	62	second stage of labor	47	8
6	interval	62	second stage of labor	14.38	1
1	initiation	63	second stage of labor	40.8	4
1	apex	63	second stage of labor	75	9
1	interval	63	second stage of labor	4.83333	1
2	initiation	63	second stage of labor	34	4
2	apex	63	second stage of labor	59	9
2	interval	63	second stage of labor	10.0741	1
3	initiation	63	second stage of labor	42.2	4
3	apex	63	second stage of labor	86	9
3	interval	63	second stage of labor	12.02	1
1	initiation	64	second stage of labor	25.2	6
1	apex	64	second stage of labor	27	9
1	interval	64	second stage of labor	11.5319	5
2	initiation	64	second stage of labor	23.6	6
2	apex	64	second stage of labor	39	9
2	interval	64	second stage of labor	18.68	5
1	initiation	65	second stage of labor	38.6	6
1	apex	65	second stage of labor	60	10
1	interval	65	second stage of labor	16.4	1
2	initiation	65	second stage of labor	39.6	6
2	apex	65	second stage of labor	52	10
2	interval	65	second stage of labor	13.1778	1
3	initiation	65	second stage of labor	26.6	6
3	apex	65	second stage of labor	27	10
3	interval	65	second stage of labor	7.96429	1
4	initiation	65	second stage of labor	43.4	6
4	apex	65	second stage of labor	73	10
4	interval	65	second stage of labor	6.06	1
5	initiation	65	second stage of labor	27	6
5	apex	65	second stage of labor	53	10
5	interval	65	second stage of labor	8.04	1
6	initiation	65	second stage of labor	46.6	6
6	apex	65	second stage of labor	70	10
6	interval	65	second stage of labor	24.44	1
7	initiation	65	second stage of labor	54.8	6
7	apex	65	second stage of labor	63	10
7	interval	65	second stage of labor	26.2	1
8	initiation	65	second stage of labor	42.2	6
8	apex	65	second stage of labor	48	10
8	interval	65	second stage of labor	19.0909	1
9	initiation	65	second stage of labor	37	6
9	apex	65	second stage of labor	51	10
9	interval	65	second stage of labor	11.6757	1
10	initiation	65	second stage of labor	43.4	6
10	apex	65	second stage of labor	52	10
10	interval	65	second stage of labor	16.98	1
1	initiation	66	second stage of labor	16.6	5
1	apex	66	second stage of labor	35	9
1	interval	66	second stage of labor	28.6046	4
2	initiation	66	second stage of labor	23.6	5
2	apex	66	second stage of labor	31	9
2	interval	66	second stage of labor	12.6	4
3	initiation	66	second stage of labor	15.8	5
3	apex	66	second stage of labor	24	9
3	interval	66	second stage of labor	24.26	4
4	initiation	66	second stage of labor	32.8	5
4	apex	66	second stage of labor	60	9
4	interval	66	second stage of labor	19.52	4
5	initiation	66	second stage of labor	26.6	5
5	apex	66	second stage of labor	29	9
5	interval	66	second stage of labor	16.2895	4
6	initiation	66	second stage of labor	15.4	5
6	apex	66	second stage of labor	36	9
6	interval	66	second stage of labor	16.4546	4
7	initiation	66	second stage of labor	21	5
7	apex	66	second stage of labor	40	9
7	interval	66	second stage of labor	14.42	4
1	initiation	67	second stage of labor	43.2	6
1	apex	67	second stage of labor	54	10
1	interval	67	second stage of labor	37.6	5
2	initiation	67	second stage of labor	45	6
2	apex	67	second stage of labor	57	10
2	interval	67	second stage of labor	36.9768	5
3	initiation	67	second stage of labor	34.8	6
3	apex	67	second stage of labor	55	10
3	interval	67	second stage of labor	4.72	5
1	initiation	68	second stage of labor	24.6	4
1	apex	68	second stage of labor	55	10
1	interval	68	second stage of labor	3.66	1
2	initiation	68	second stage of labor	41.4	4
2	apex	68	second stage of labor	68	10
2	interval	68	second stage of labor	31.64	1
3	initiation	68	second stage of labor	25.8	4
3	apex	68	second stage of labor	55	10
3	interval	68	second stage of labor	27.6667	1
4	initiation	68	second stage of labor	41.2	4
4	apex	68	second stage of labor	59	10
4	interval	68	second stage of labor	15.96	1
5	initiation	68	second stage of labor	53.8	4
5	apex	68	second stage of labor	65	10
5	interval	68	second stage of labor	1.7	1
6	initiation	68	second stage of labor	32.2	4
6	apex	68	second stage of labor	43	10
6	interval	68	second stage of labor	15.4167	1
7	initiation	68	second stage of labor	35.8	4
7	apex	68	second stage of labor	46	10
7	interval	68	second stage of labor	12.56	1
1	initiation	69	second stage of labor	6.8	3
1	apex	69	second stage of labor	10	8
1	interval	69	second stage of labor	6.48	2
2	initiation	69	second stage of labor	1	1
2	apex	69	second stage of labor	23	7
2	interval	69	second stage of labor	8.86486	2
3	initiation	69	second stage of labor	6.2	2
3	apex	69	second stage of labor	30	10
3	interval	69	second stage of labor	7.43333	7
4	initiation	69	second stage of labor	26.2	1
4	apex	69	second stage of labor	39	8
4	interval	69	second stage of labor	19.9333	1
5	initiation	69	second stage of labor	51.6	0
5	apex	69	second stage of labor	55	10
5	interval	69	second stage of labor	23.72	8
1	initiation	70	second stage of labor	36	5
1	apex	70	second stage of labor	57	10
1	interval	70	second stage of labor	12.42	4
2	initiation	70	second stage of labor	26.4	5
2	apex	70	second stage of labor	49	10
2	interval	70	second stage of labor	12.3913	4
3	initiation	70	second stage of labor	30	5
3	apex	70	second stage of labor	41	10
3	interval	70	second stage of labor	20.8333	4
4	initiation	70	second stage of labor	33.4	5
4	apex	70	second stage of labor	35	10
4	interval	70	second stage of labor	8.43902	4
5	initiation	70	second stage of labor	18.6	5
5	apex	70	second stage of labor	36	10
5	interval	70	second stage of labor	3.04	4
1	initiation	71	second stage of labor	36.4	6
1	apex	71	second stage of labor	49	8
1	interval	71	second stage of labor	9.91111	1
2	initiation	71	second stage of labor	27.4	6
2	apex	71	second stage of labor	58	8
2	interval	71	second stage of labor	5.14	1
3	initiation	71	second stage of labor	26.2	6
3	apex	71	second stage of labor	49	8
3	interval	71	second stage of labor	3.4	1
4	initiation	71	second stage of labor	19	6
4	apex	71	second stage of labor	54	8
4	interval	71	second stage of labor	3.61538	1
5	initiation	71	second stage of labor	33.2	6
5	apex	71	second stage of labor	53	8
5	interval	71	second stage of labor	1.16	1
6	initiation	71	second stage of labor	18	6
6	apex	71	second stage of labor	49	8
6	interval	71	second stage of labor	4.35897	1
7	initiation	71	second stage of labor	41.4	6
7	apex	71	second stage of labor	53	8
7	interval	71	second stage of labor	3.92857	1
8	initiation	71	second stage of labor	23.8	6
8	apex	71	second stage of labor	36	8
8	interval	71	second stage of labor	14.64	1
9	initiation	71	second stage of labor	35.8	6
9	apex	71	second stage of labor	42	8
9	interval	71	second stage of labor	2.28	1
10	initiation	71	second stage of labor	27	6
10	apex	71	second stage of labor	56	8
10	interval	71	second stage of labor	18.62	1
1	initiation	72	second stage of labor	23.8	5
1	apex	72	second stage of labor	58	8
1	interval	72	second stage of labor	13.9259	1
2	initiation	72	second stage of labor	34.2	5
2	apex	72	second stage of labor	40	8
2	interval	72	second stage of labor	11.95	1
3	initiation	72	second stage of labor	13.2	5
3	apex	72	second stage of labor	40	8
3	interval	72	second stage of labor	23.25	1
4	initiation	72	second stage of labor	16	5
4	apex	72	second stage of labor	29	8
4	interval	72	second stage of labor	9.82609	1
5	initiation	72	second stage of labor	14	5
5	apex	72	second stage of labor	26	8
5	interval	72	second stage of labor	13.78	1
6	initiation	72	second stage of labor	26.6	5
6	apex	72	second stage of labor	37	8
6	interval	72	second stage of labor	32.8	1
7	initiation	72	second stage of labor	28.8	5
7	apex	72	second stage of labor	57	8
7	interval	72	second stage of labor	16.04	1
1	initiation	73	second stage of labor	25.8	5
1	apex	73	second stage of labor	31	9
1	interval	73	second stage of labor	17.6	5
2	initiation	73	second stage of labor	33.6	5
2	apex	73	second stage of labor	44	9
2	interval	73	second stage of labor	14.44	5
3	initiation	73	second stage of labor	27.6	5
3	apex	73	second stage of labor	73	9
3	interval	73	second stage of labor	16.38	5
4	initiation	73	second stage of labor	49.8	5
4	apex	73	second stage of labor	96	9
4	interval	73	second stage of labor	31.32	5
5	initiation	73	second stage of labor	36.6	5
5	apex	73	second stage of labor	93	9
5	interval	73	second stage of labor	32.5333	5
6	initiation	73	second stage of labor	50.8	5
6	apex	73	second stage of labor	80	9
6	interval	73	second stage of labor	23.0333	5
1	initiation	74	second stage of labor	20.6	3
1	apex	74	second stage of labor	21	7
1	interval	74	second stage of labor	9.46	1
2	initiation	74	second stage of labor	26.6	3
2	apex	74	second stage of labor	59	7
2	interval	74	second stage of labor	11.04	1
3	initiation	74	second stage of labor	24.4	3
3	apex	74	second stage of labor	51	7
3	interval	74	second stage of labor	5.82	1
4	initiation	74	second stage of labor	28.4	3
4	apex	74	second stage of labor	49	7
4	interval	74	second stage of labor	5.56	1
5	initiation	74	second stage of labor	30.8	3
5	apex	74	second stage of labor	63	7
5	interval	74	second stage of labor	4.74	1
6	initiation	74	second stage of labor	45.6	3
6	apex	74	second stage of labor	97	7
6	interval	74	second stage of labor	2.66	1
7	initiation	74	second stage of labor	36.8	3
7	apex	74	second stage of labor	46	7
7	interval	74	second stage of labor	8.12	1
8	initiation	74	second stage of labor	31	3
8	apex	74	second stage of labor	62	7
8	interval	74	second stage of labor	10.18	1
1	initiation	75	second stage of labor	27	5
1	apex	75	second stage of labor	36	9
1	interval	75	second stage of labor	24.8571	2
2	initiation	75	second stage of labor	48.6	5
2	apex	75	second stage of labor	60	9
2	interval	75	second stage of labor	20.5833	2
3	initiation	75	second stage of labor	40.6	5
3	apex	75	second stage of labor	103	9
3	interval	75	second stage of labor	28.84	2
1	initiation	76	second stage of labor	12.4	4
1	apex	76	second stage of labor	30	9
1	interval	76	second stage of labor	22.7143	1
2	initiation	76	second stage of labor	24	4
2	apex	76	second stage of labor	26	9
2	interval	76	second stage of labor	25.625	1
3	initiation	76	second stage of labor	25.6	4
3	apex	76	second stage of labor	69	9
3	interval	76	second stage of labor	60.3	1
4	initiation	76	second stage of labor	66.4	4
4	apex	76	second stage of labor	67	9
4	interval	76	second stage of labor	21.4286	1
5	initiation	76	second stage of labor	21.4	4
5	apex	76	second stage of labor	32	9
1	initiation	77	second stage of labor	23.6	6
1	apex	77	second stage of labor	37	10
1	interval	77	second stage of labor	5.5122	5
2	initiation	77	second stage of labor	18.6	6
2	apex	77	second stage of labor	36	10
2	interval	77	second stage of labor	15.72	5
3	initiation	77	second stage of labor	35.4	6
3	apex	77	second stage of labor	66	10
3	interval	77	second stage of labor	14.6316	5
4	initiation	77	second stage of labor	33.6	6
4	apex	77	second stage of labor	60	10
4	interval	77	second stage of labor	13	5
5	initiation	77	second stage of labor	35	6
5	apex	77	second stage of labor	78	10
5	interval	77	second stage of labor	23.64	5
6	initiation	77	second stage of labor	14.4	6
6	apex	77	second stage of labor	28	10
6	interval	77	second stage of labor	18.875	5
7	initiation	77	second stage of labor	43.2	6
7	apex	77	second stage of labor	77	10
7	interval	77	second stage of labor	21.2857	5
8	initiation	77	second stage of labor	36.4	6
8	apex	77	second stage of labor	88	10
8	interval	77	second stage of labor	23.697	5
9	initiation	77	second stage of labor	50.2	6
9	apex	77	second stage of labor	81	10
9	interval	77	second stage of labor	28.7778	5
10	initiation	77	second stage of labor	60	6
10	apex	77	second stage of labor	81	10
10	interval	77	second stage of labor	20.18	5
11	initiation	77	second stage of labor	52.8	6
11	apex	77	second stage of labor	85	10
11	interval	77	second stage of labor	26.5	5
12	initiation	77	second stage of labor	45.6	6
12	apex	77	second stage of labor	64	10
12	interval	77	second stage of labor	38.14	5
1	initiation	78	second stage of labor	24	5
1	apex	78	second stage of labor	44	9
1	interval	78	second stage of labor	20.0889	4
2	initiation	78	second stage of labor	35.8	5
2	apex	78	second stage of labor	68	9
2	interval	78	second stage of labor	23.2105	4
3	initiation	78	second stage of labor	41.6	5
3	apex	78	second stage of labor	71	9
3	interval	78	second stage of labor	33.4545	4
4	initiation	78	second stage of labor	47	5
4	apex	78	second stage of labor	70	9
4	interval	78	second stage of labor	36.5	4
5	initiation	78	second stage of labor	35	5
5	apex	78	second stage of labor	35	9
5	interval	78	second stage of labor	38.4828	4
6	initiation	78	second stage of labor	36.2	5
6	apex	78	second stage of labor	39	9
6	interval	78	second stage of labor	31.6774	4
7	initiation	78	second stage of labor	34.8	5
7	apex	78	second stage of labor	37	9
7	interval	78	second stage of labor	29.26	4
1	initiation	79	second stage of labor	24.6	6
1	apex	79	second stage of labor	43	8
1	interval	79	second stage of labor	23.4375	1
2	initiation	79	second stage of labor	42.8	6
2	apex	79	second stage of labor	45	8
2	interval	79	second stage of labor	19.2727	1
3	initiation	79	second stage of labor	20.8	6
3	apex	79	second stage of labor	36	8
3	interval	79	second stage of labor	22.55	1
4	initiation	79	second stage of labor	14.8	6
4	apex	79	second stage of labor	24	8
4	interval	79	second stage of labor	3.28571	1
5	initiation	79	second stage of labor	18.2	6
5	apex	79	second stage of labor	19	8
5	interval	79	second stage of labor	9.32143	1
6	initiation	79	second stage of labor	10	6
6	apex	79	second stage of labor	18	8
6	interval	79	second stage of labor	6.40741	1
7	initiation	79	second stage of labor	9.8	6
7	apex	79	second stage of labor	18	8
7	interval	79	second stage of labor	7.58621	1
8	initiation	79	second stage of labor	7	6
8	apex	79	second stage of labor	20	8
8	interval	79	second stage of labor	6.15625	1
9	initiation	79	second stage of labor	15.4	6
9	apex	79	second stage of labor	26	8
9	interval	79	second stage of labor	12.5227	1
10	initiation	79	second stage of labor	20.4	6
10	apex	79	second stage of labor	21	8
10	interval	79	second stage of labor	13.36	1
1	initiation	80	second stage of labor	26	7
1	apex	80	second stage of labor	43	10
1	interval	80	second stage of labor	22.5	6
2	initiation	80	second stage of labor	27.2	7
2	apex	80	second stage of labor	50	10
2	interval	80	second stage of labor	17.24	6
